# Supplementary material for: Agrin mediates chondrocyte homeostasis and requires both LRP4 and α-dystroglycan to enhance cartilage formation in vitro and in vivo
Source: HighWire-hosted journal article supplement (doi:10.1136/annrheumdis-2015-207316), 2015-08-20

## Supplementary Figures:

Supplementary figure 1. (A) Real time PCR analysis of Agrin mRNA expression in C28/I2 cells and (B) bovine primary chondrocytes cultured in monolayer or 3D pellets for 14days. (C) Agrin immune-detectable protein in primary bovine chondrocyte 3D pellet cultures.

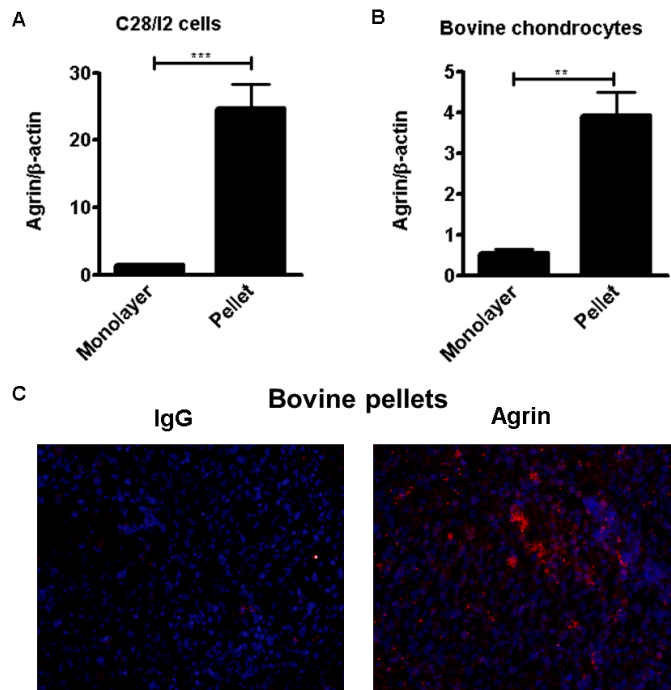

Supplementary figure 2. (A) Mitomycin C treatment (7.5 $\mu$ g/ml) successfully growth arrested COS7. (B) Agrin and GFP over-expression persisted in mitomycin C treated COS7 cells for up to 3 weeks.

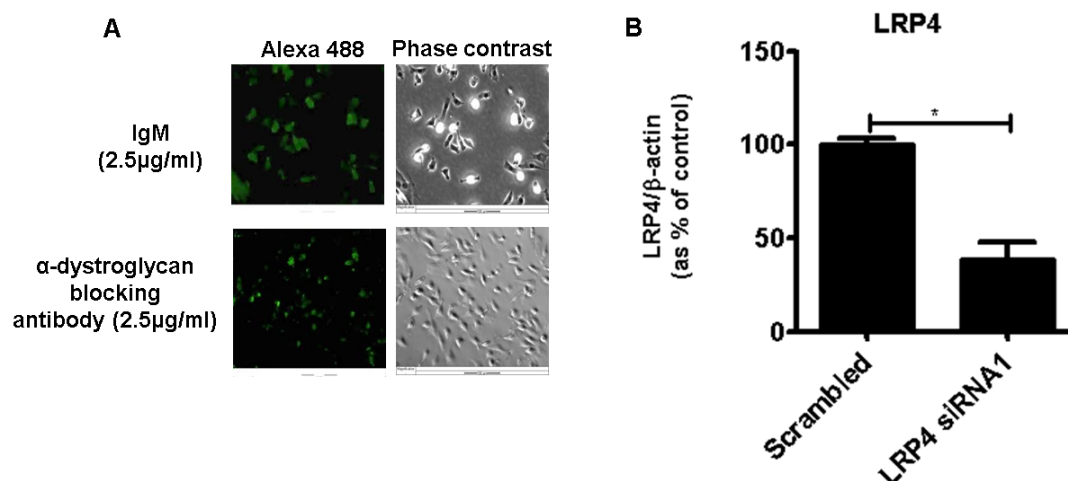

Supplementary figure 3. (A) Blockade of  $\alpha$ -dystroglycan was confirmed by reduced f-actin production as measured by phalloidin staining compared to IgM control. (B) LRP4 expression was reduced to 50% as measured by real time PCR 24 hours after siRNA transfection.

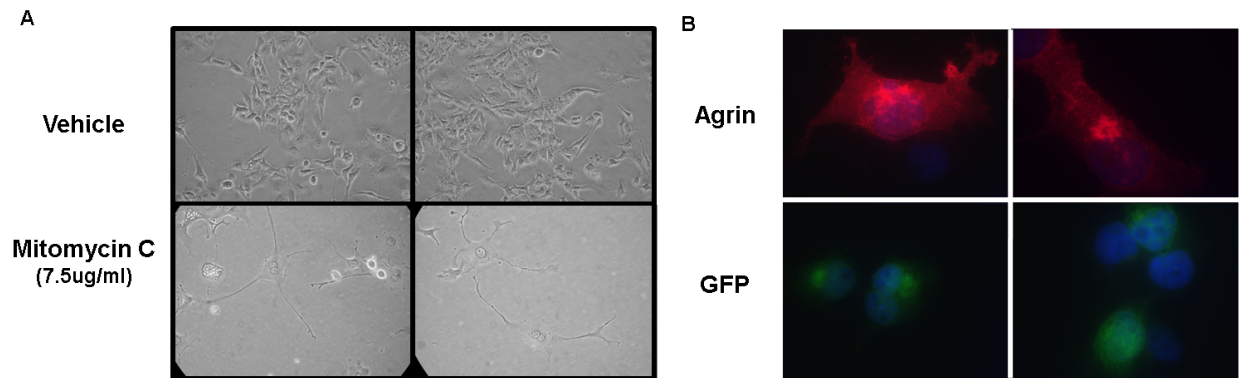

Supplement: annrheumdis-2015-207316supp.pdf [file annrheumdis-2015-207316supp.pdf]
